# Supplementary material for: SNP Assay Development for Linkage Map Construction, Anchoring Whole-Genome Sequence, and Other Genetic and Genomic Applications in Common Bean
Source: PubMed Central journal article supplement (PMC4632048; doi:10.1534/g3.115.020594), 2015-08-28
Supplement: supp_g3.115.020594_020594SI.pdf [file supp_g3.115.020594_020594SI.pdf]

**SNP assay development for linkage map construction, anchoring whole genome sequence  
and other genetic and genomic applications in common bean**

Qijian Song\*, Gaofeng Jia\*, David L. Hyten\*<sup>1</sup>, Jerry Jenkins<sup>†</sup>, Eun-Young Hwang<sup>‡</sup>, Steven G. Schroeder<sup>§</sup>, Juan M. Osorno\*\*, Jeremy Schmutz<sup>†,††</sup>, Scott A. Jackson<sup>‡‡</sup>, Phillip E. McClean\*\*, Perry B. Cregan\*

\*USDA-ARS, Soybean Genomics and Improvement Lab, Beltsville, MD 20705

<sup>†</sup>HudsonAlpha Institute for Biotechnology, Huntsville, Alabama 35806, USA

<sup>‡</sup>Department of Plant Science and Landscape Architecture, University of Maryland, College Park, MD 20742

<sup>§</sup>USDA-ARS, Bovine Functional Genomics Laboratory, Animal and Natural Resources Institute, Beltsville, MD, 20705, USA

\*\*Department of Plant Sciences, North Dakota State University, Fargo, ND 58102, USA

<sup>††</sup>Joint Genome Institute, 2800 Mitchell Drive, Walnut Creek, California 94598, USA.

<sup>‡‡</sup>Center for Applied Genetic Technologies, University of Georgia, Athens, Georgia 30602, USA.

<sup>1</sup>**Present address:** Dep. of Agronomy and Horticulture, 322 Keim Hall, University of Nebraska, Lincoln, NE 68583, USA

**Correspondence author:** Qijian Song, Soybean Genomics and Improvement Laboratory, Beltsville Agricultural Research Center – West, USDA, ARS, Beltsville, MD 20705-2350. Tel: 301-504-5723, e-mail:

[Qijian.Song@ars.usda.gov](mailto:Qijian.Song@ars.usda.gov)

## Tables S1-S5

Available for download as Excel files at [www.g3journal.org/lookup/suppl/doi:10.1534/g3.115.020594/-/DC1](http://www.g3journal.org/lookup/suppl/doi:10.1534/g3.115.020594/-/DC1)

**Table S1.** Market class and race of common bean accessions genotyped with the BARCBear6K\_1 and BARCBear6K\_2 Illumina BeadChips.

**Table S2.** BARCBear6K\_1 SNPs and analysis: SNP ID, NCBI submitted SNP ID number, SNP alleles, Chromosome and SNP position in the v1.0 *P. vulgaris* assembly, 60nt of SNP flanking sequence, Minor Allele Frequency (MAF) of the SNP in the sequence analysis of the 17 cultivars, Illumina SNP Design Score, Inclusion of SNP in the BARCBear6K\_1 beadpool (Y/N), Polymorphism of the SNP in the BARCBear6K\_1 analysis, MAF >0.05 in the analysis of the 499 BeanCAP lines (Y/N) and Ambiguous allele calls in the BeanCAP line analysis <10% (Y/N)

**Table S3.** BARCBear6K\_2 SNPs and analysis: SNP ID, NCBI submitted SNP ID number, SNP alleles, Chromosome and SNP position in the v1.0 *P. vulgaris* assembly, 60nt of SNP flanking sequence, Minor Allele Frequency (MAF) of the SNP in the sequence analysis of the 17 cultivars, Illumina SNP Design Score, Inclusion of SNP in the BARCBear6K\_2 beadpool (Y/N), Polymorphism of the SNP in the BARCBear6K\_2 analysis, MAF >0.05 in the analysis of the 499 BeanCAP lines (Y/N) and Ambiguous allele calls in the BeanCAP line analysis <10% (Y/N).

**Table S4.** Linkage group and linkage position (cM) of markers in the Stampede x Red Hawk (SR) F<sub>2</sub> linkage map and alignment of the SNP flanking sequence to the v0.9 *Phaseolus vulgaris* genome assembly

**Table S5.** The BARCBear6K\_3 SNPs and analysis: SNP ID; NCBI ssID; Included in the BARCBear6K\_3 Beadpool (Y/N); Chromosome and SNP position in the v1.0 *P. vulgaris* assembly; Minor Allele Frequency (MAF) of the SNP in the sequence analysis of the 499 diverse BeanCAP common bean genotypes; % of BeanCAP lines with missing or ambiguous allele calls; Polymorphism in the common bean races Nueva Granada, Mesoamerican, and Durango and in the snap bean genotypes; Polymorphism within the Middle American and Andean gene pools; Number of dry bean races with polymorphism; Linkage group and cM position in the Stampede x Red Hawk mapping population; SNP location in a gene (Y/N); Position in gene if applicable; Source of the SNP either BARCBear6K\_1 or BARCBear6K\_2 BeadChip and the 60 nt of SNP flanking sequence.

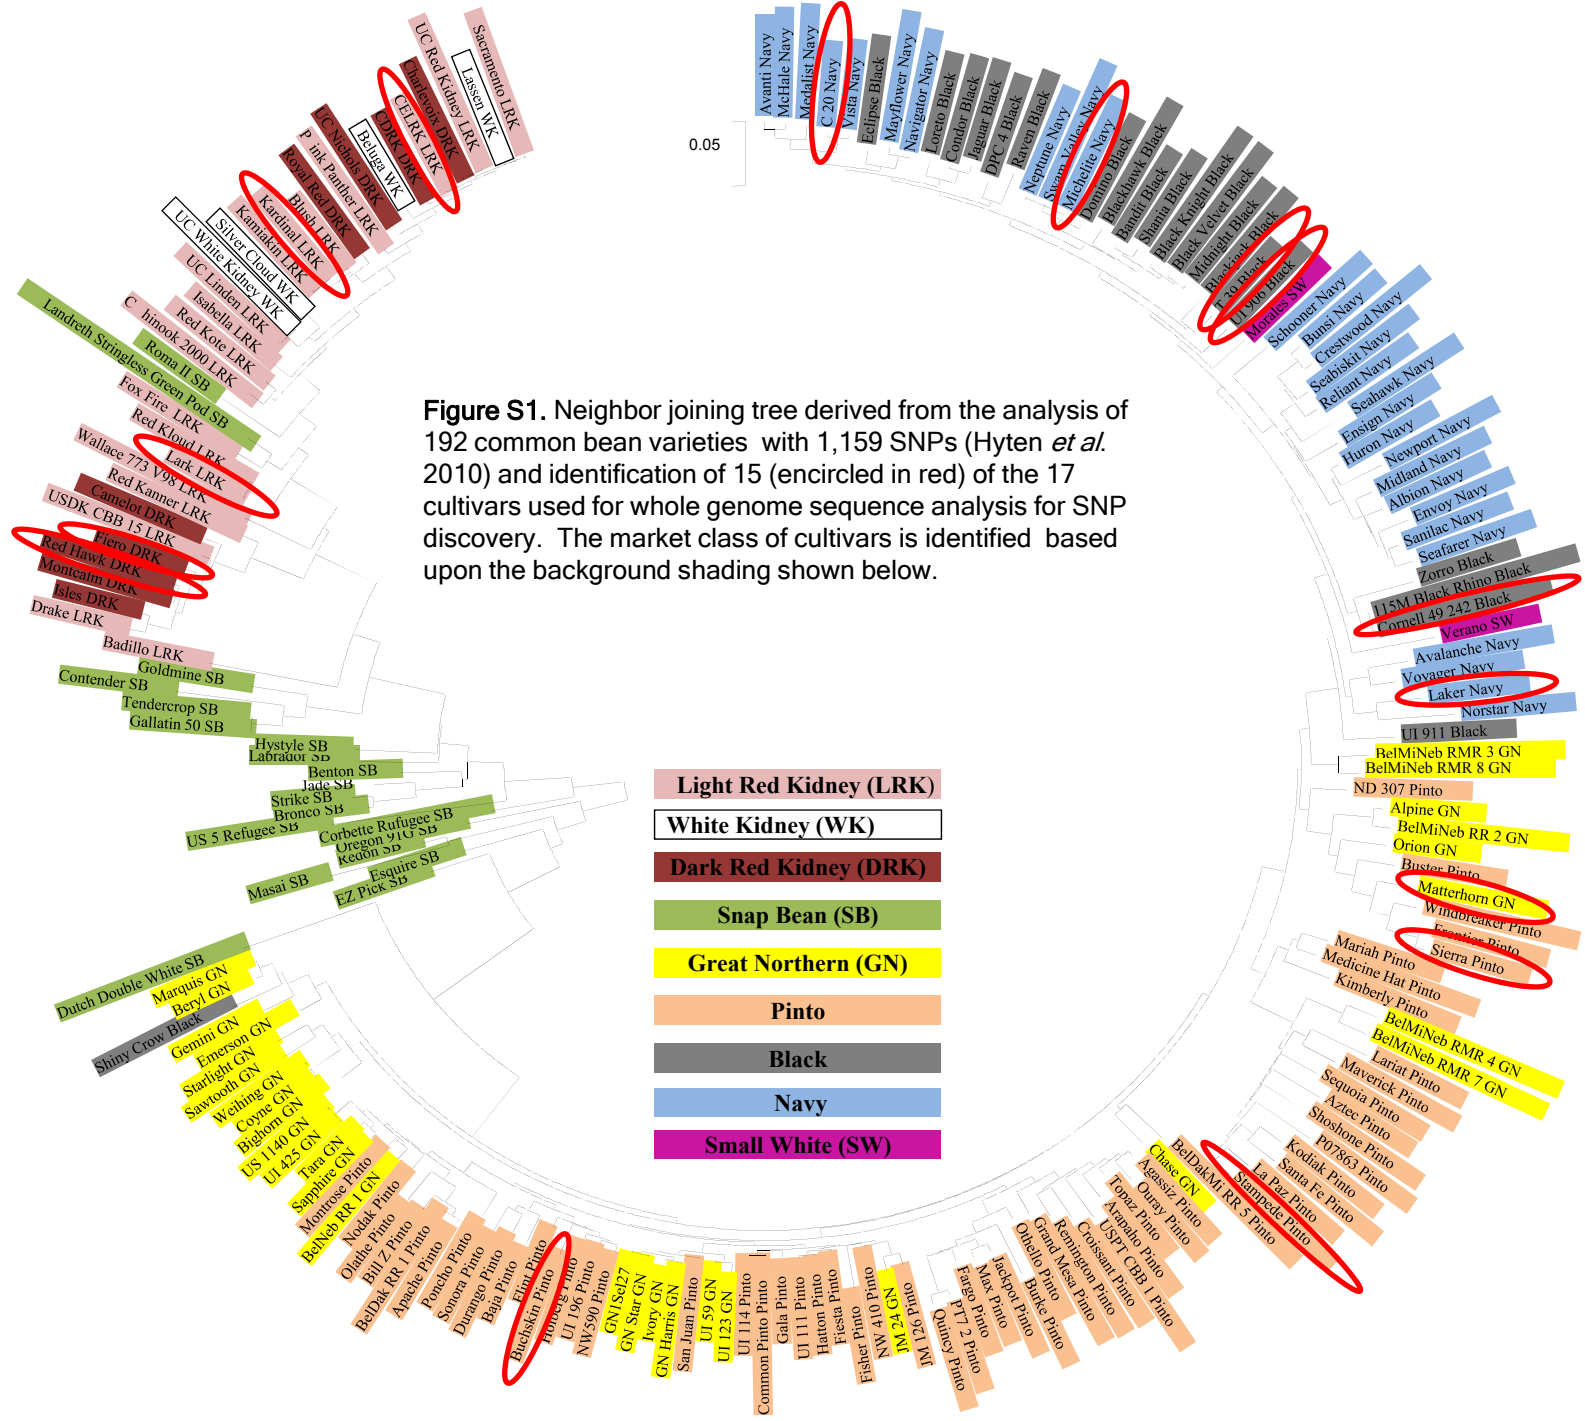

**Figure S1.** Neighbor joining tree derived from the analysis of 192 common bean varieties with 1,159 SNPs (Hyten *et al.* 2010) and identification of 15 (encircled in red) of the 17 cultivars used for whole genome sequence analysis for SNP discovery. The market class of cultivars is identified based upon the background shading shown below.
