# Supplementary material for: SNP Assay Development for Linkage Map Construction, Anchoring Whole-Genome Sequence, and Other Genetic and Genomic Applications in Common Bean
Source: PubMed Central journal article supplement (PMC4632048; doi:10.1534/g3.115.020594), 2015-08-28
Supplement: supp_g3.115.020594_FigureS1.pdf [file supp_g3.115.020594_FigureS1.pdf]

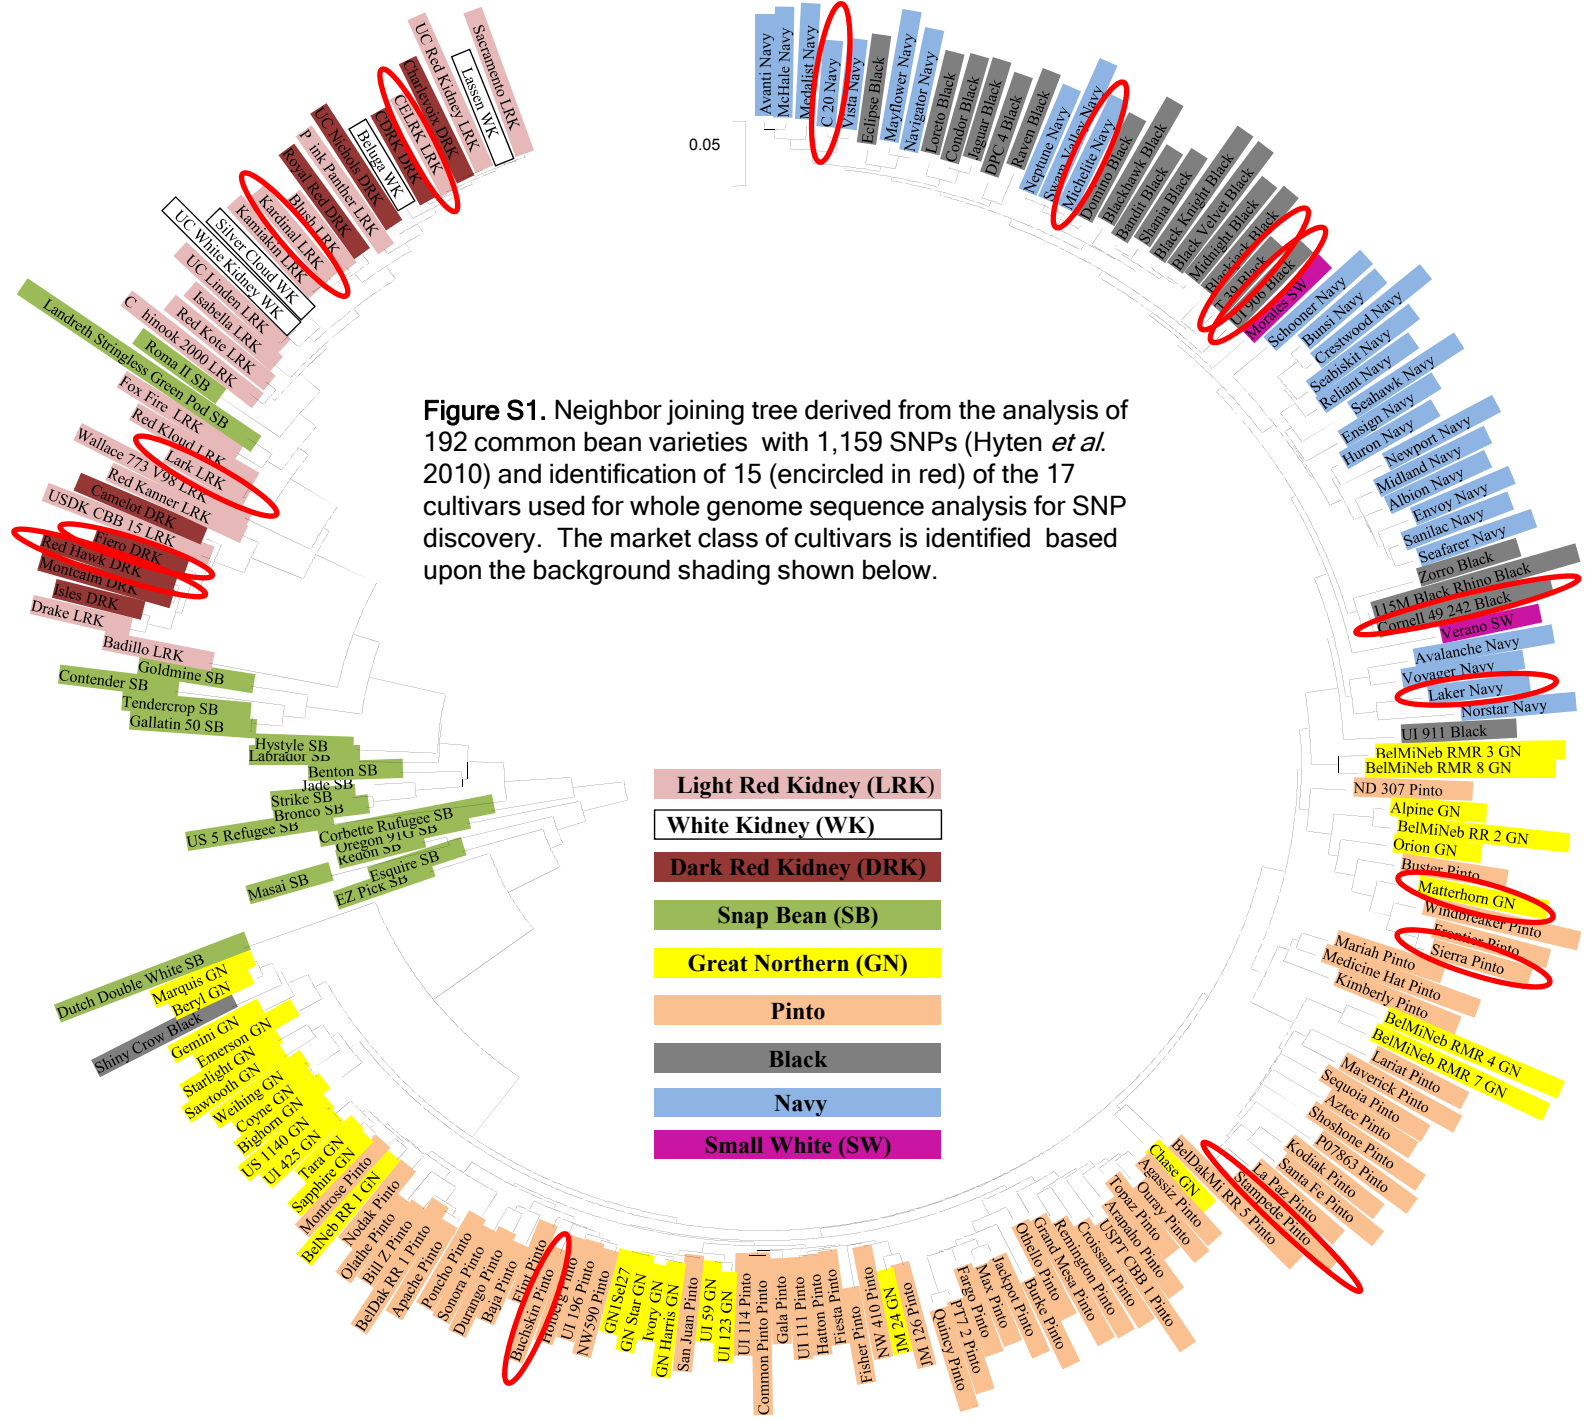

**Figure S1.** Neighbor joining tree derived from the analysis of 192 common bean varieties with 1,159 SNPs (Hyten *et al.* 2010) and identification of 15 (encircled in red) of the 17 cultivars used for whole genome sequence analysis for SNP discovery. The market class of cultivars is identified based upon the background shading shown below.
